# Supplementary material for: Additive Beneficial Effects of Valsartan Combined with Rosuvastatin in the Treatment of Hypercholesterolemic Hypertensive Patients
Source: PubMed Central journal article supplement — Korean Circ J. 2015 May 27;45(3):225–33. doi: 10.4070/kcj.2015.45.3.225 (PMC4446817; doi:10.4070/kcj.2015.45.3.225), 2015-05-27
Supplement: kcj-45-225-s001.pdf [file kcj-45-225-s001.pdf]

**Supplementary Table 1.** Changes of pulse pressure and fasting glucose level at week 8

|                        | <b>Combination<br/>(n=41)</b> | <b>Valsartan<br/>(n=40)</b> | <b>Rosuvastatin<br/>(n=35)</b> |
|------------------------|-------------------------------|-----------------------------|--------------------------------|
| Pulse pressure, mm Hg  |                               |                             |                                |
| Before                 | 52.6±10.2                     | 60±11.9                     | 56.6±10.9                      |
| After                  | 51.2±12.5                     | 55.6±11.6                   | 55.0±11.9                      |
| Change                 | -1.3±9.2                      | -4.4±10.9                   | -1.6±9.4                       |
| p                      | 0.21                          | 0.01                        | 0.32                           |
| Fasting glucose, mg/dL |                               |                             |                                |
| Before                 | 109±27                        | 103±12                      | 112±24                         |
| After                  | 115±56                        | 104±14                      | 109±25                         |
| % change               | 5.6±42.1                      | 1.5±10.8                    | -2.8±14.1                      |
| p                      | 0.13                          | 0.37                        | 0.25                           |

Values are mean±SD.
